# Supplementary material
Source: PubMed Central journal article supplement (PMC7960173)
Supplement: 15-00472.pdf [file 15-00472.pdf]

**On-line Table: Characteristics of the included studies**

| Author, Year                          | No. of Patients | No. of Aneurysms | Mean Aneurysm Size | Mean Patient Age in Years (SD) | Patient-Years | Aneurysm-Years | Mean Follow-Up Time (yr) | Study Population | Study Design | Imaging       | Study Risk of Bias |
|---------------------------------------|-----------------|------------------|--------------------|--------------------------------|---------------|----------------|--------------------------|------------------|--------------|---------------|--------------------|
| Asari and Ohmoto, 1993 <sup>15</sup>  | 54              | 72               | NA                 | 60.5                           | 194.4         | 259.2          | 3.6                      | Japanese         | R            | MRA, DSA      | High               |
| Burns et al, 2009 <sup>16</sup>       | 165             | 191              | 4.9                | 64 (13)                        | 643.5         | 744.9          | 3.9                      | North American   | R            | MRA           | High               |
| Chien et al, 2013 <sup>17</sup>       | 235             | 319              | 3.6 (1.4)          | 62.0 (13.6)                    | 564           | 765.6          | 2.4                      | North American   | R            | CTA           | High               |
| Güresir et al, 2013 <sup>18</sup>     | 263             | 384              | 3.6 (1.7)          | 55 (12)                        | 1052          | 1536           | 4                        | German           | P            | DSA           | Medium             |
| Inoue et al, 2012 <sup>20</sup>       | 1002            | 1325             | NA                 | 65                             | 801.6         | 1060           | 1.0                      | Japanese         | R            | MRA           | High               |
| Inoue, 2002 <sup>19</sup>             | 39              | 39               | NA                 | NA                             | 62.4          | 62.4           | 1.6                      | Japanese         | R            | NA            | High               |
| Jeon et al, 2014 <sup>21</sup>        | 524             | 568              | 3.5 (0.9)          | 59.4 (10.9)                    | 1519.6        | 1647.2         | 2.9                      | Korean           | R            | MRA, DSA      | High               |
| Juvella et al, 2001 <sup>22</sup>     | 87              | 87               | 5.1 (4.1)          | 38.4 (9.1)                     | 1648          | 1648           | 18.9                     | Finnish          | R            | CTA, DSA      | Low                |
| Kubo et al, 2014 <sup>23</sup>        | 79              | 98               | 4.9 (2.3)          | 73.9 (3.3)                     | 252.8         | 313.6          | 3.2                      | Japanese         | P            | MRA, DSA, CTA | Medium             |
| Matsubara, et al, 2004 <sup>24</sup>  | 140             | 166              | NA                 | 62.8                           | 210           | 249            | 1.5                      | Japanese         | R            | CTA           | High               |
| Matsumoto et al, 2013 <sup>25</sup>   | 111             | 136              | NA                 | 65 (11)                        | 222           | 272            | 2                        | Japanese         | R            | MRA           | High               |
| Mehan et al, 2014 <sup>12</sup>       | 152             | 180              | 5.6                | 61.5                           | 516.8         | 612            | 3.4                      | North American   | R            | CTA           | High               |
| Miyazawa et al, 2006 <sup>26</sup>    | 130             | 159              | 4.2                | 68.8                           | 312           | 381.6          | 2.4                      | Japanese         | R            | MRA, CTA      | High               |
| Nakase et al, 2006 <sup>27</sup>      | 13              | 13               | 2.5                | NA                             | 58.5          | 58.5           | 4.5                      | Japanese         | R            | NA            | High               |
| Phan et al, 2002 <sup>28</sup>        | 57              | 62               | 5                  | 60                             | 239.4         | 260.4          | 4.2                      | North American   | R            | MRA           | High               |
| So et al, 2010 <sup>29</sup>          | 208             | 285              | 4                  | 51.1                           | 374.4         | 513            | 1.8                      | Australian       | R            | NA            | High               |
| Sonobe et al, 2010 <sup>9</sup>       | 374             | 448              | 3.3 (0.9)          | 61.9 (10.3)                    | 1307          | 1554           | 4.8                      | Japanese         | P            | MRA, CTA, DSA | Low                |
| Sprengers et al, 2009 <sup>30</sup>   | 13              | 20               | 3.1                | 52                             | 65            | 100            | 5                        | Netherlands      | R            | MRA           | High               |
| Villablanca et al, 2013 <sup>31</sup> | 165             | 258              | 6.2                | 77.2 (7.9)                     | 363           | 567.6          | 2.2                      | North American   | P            | CTA           | Medium             |
| Wermer et al, 2005 <sup>32</sup>      | 50              | 55               | NA                 | 53.5                           | 445           | 489.5          | 8.9                      | Netherlands      | R            | CTA           | High               |
| Wermer et al, 2006 <sup>33</sup>      | 93              | 125              | <7                 | 51 (10)                        | 148.8         | 200            | 1.6                      | Netherlands      | P            | CTA/MRA       | Medium             |

**Note:**—NA indicates not applicable; R, retrospective; P, prospective.
